# Supplementary figures and images for: Intramolecular Povarov reactions involving 3-aminocoumarins
Source: Royal Society of Chemistry journal article supplement (doi:10.1039/c1ob05867c), 2011-01-01

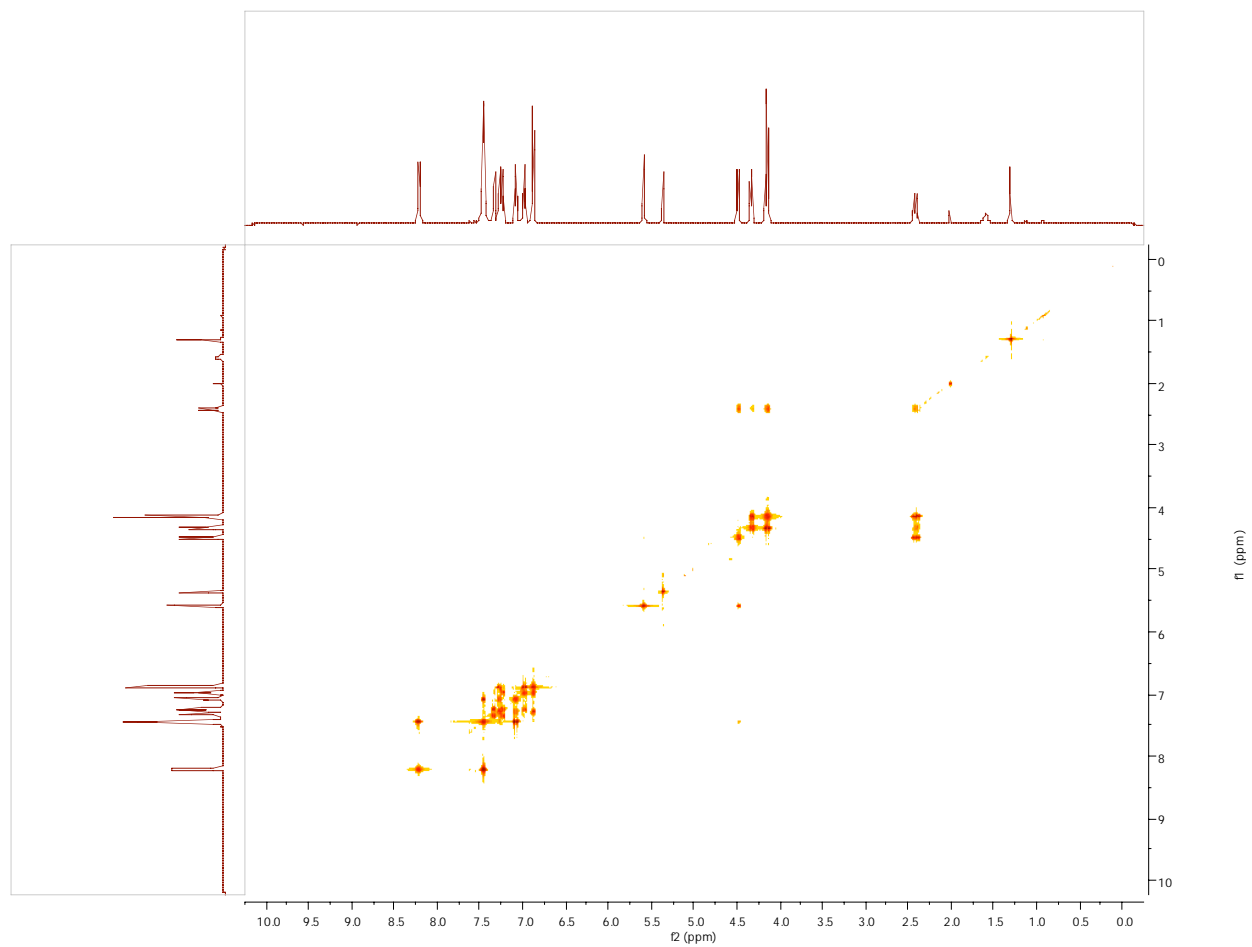

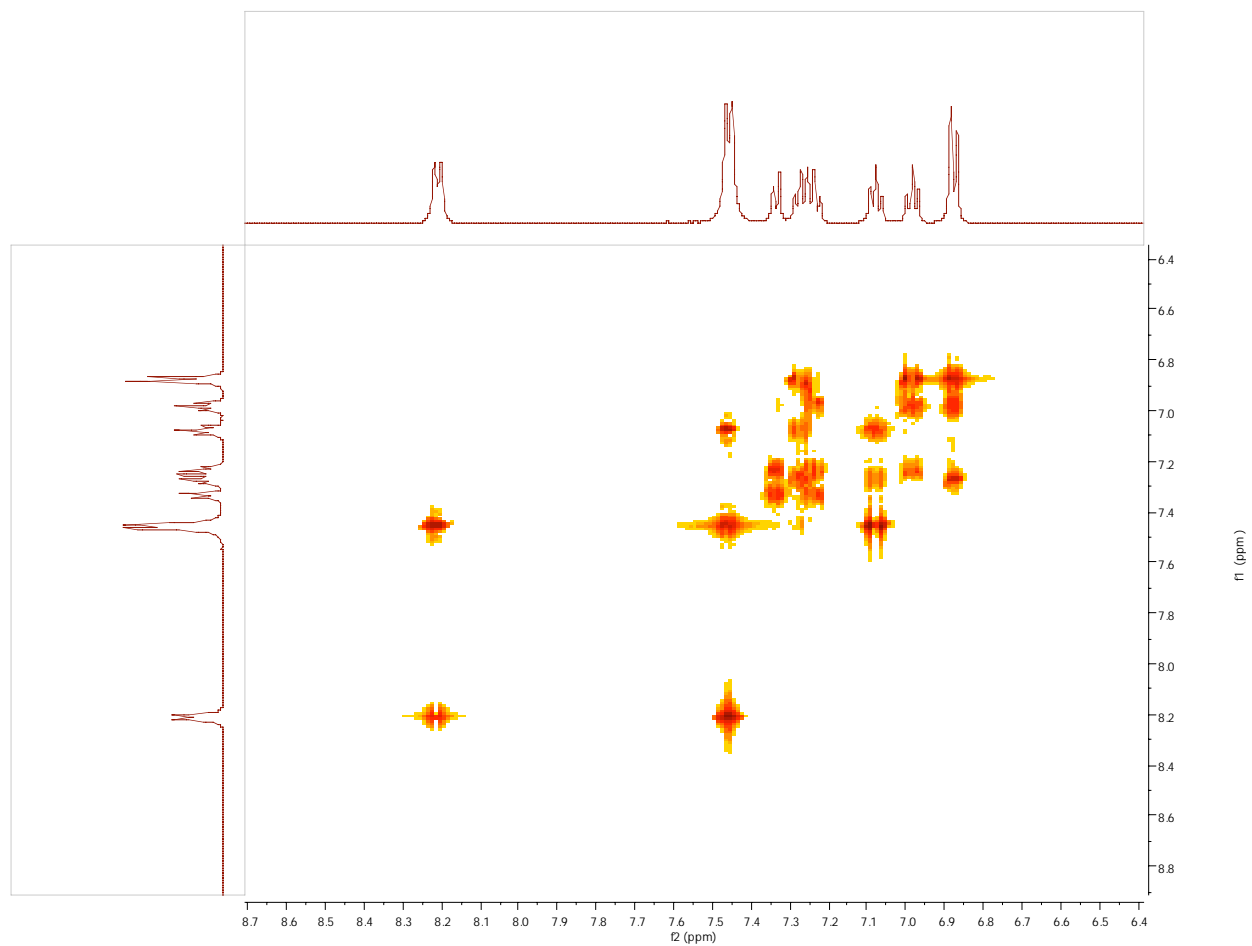

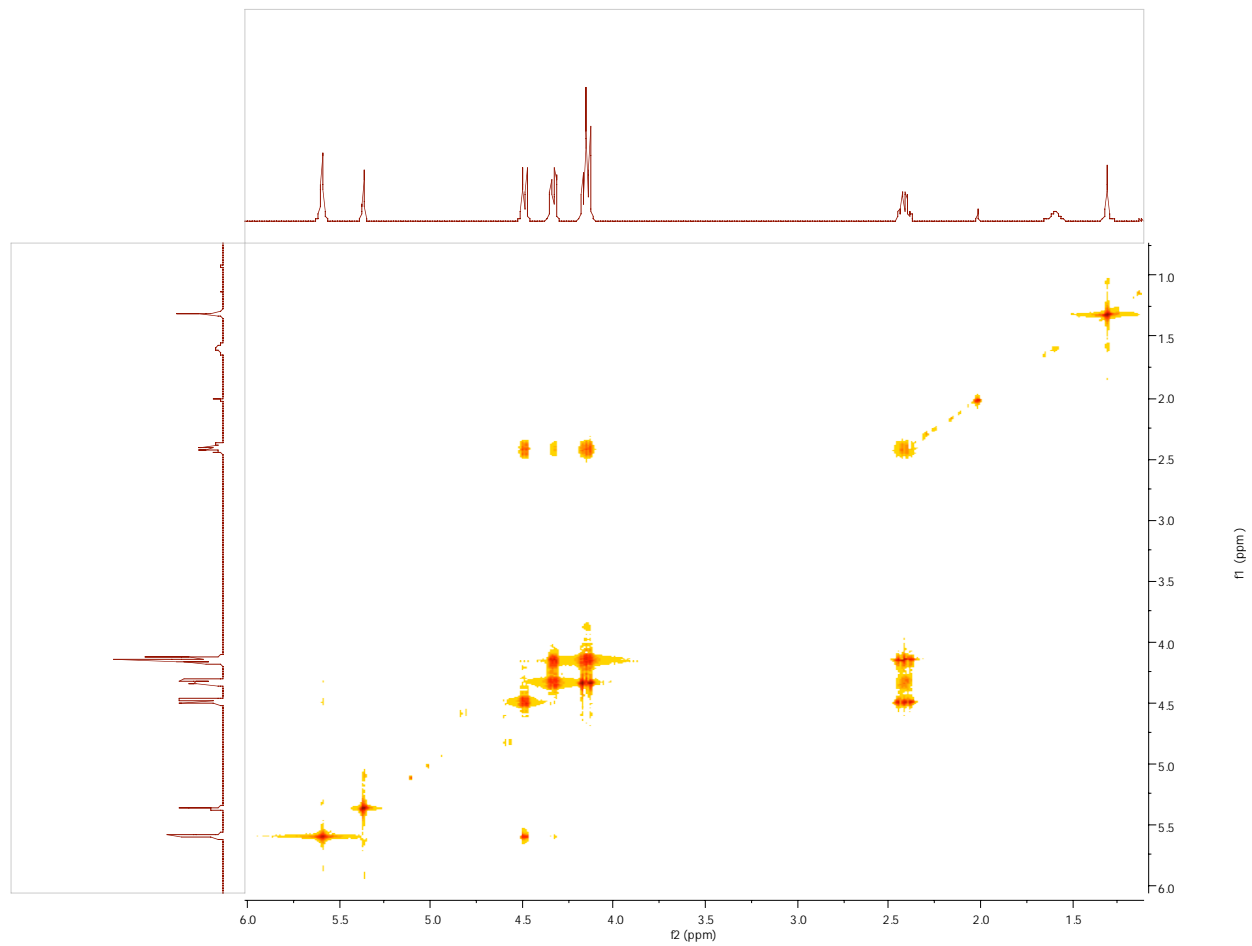

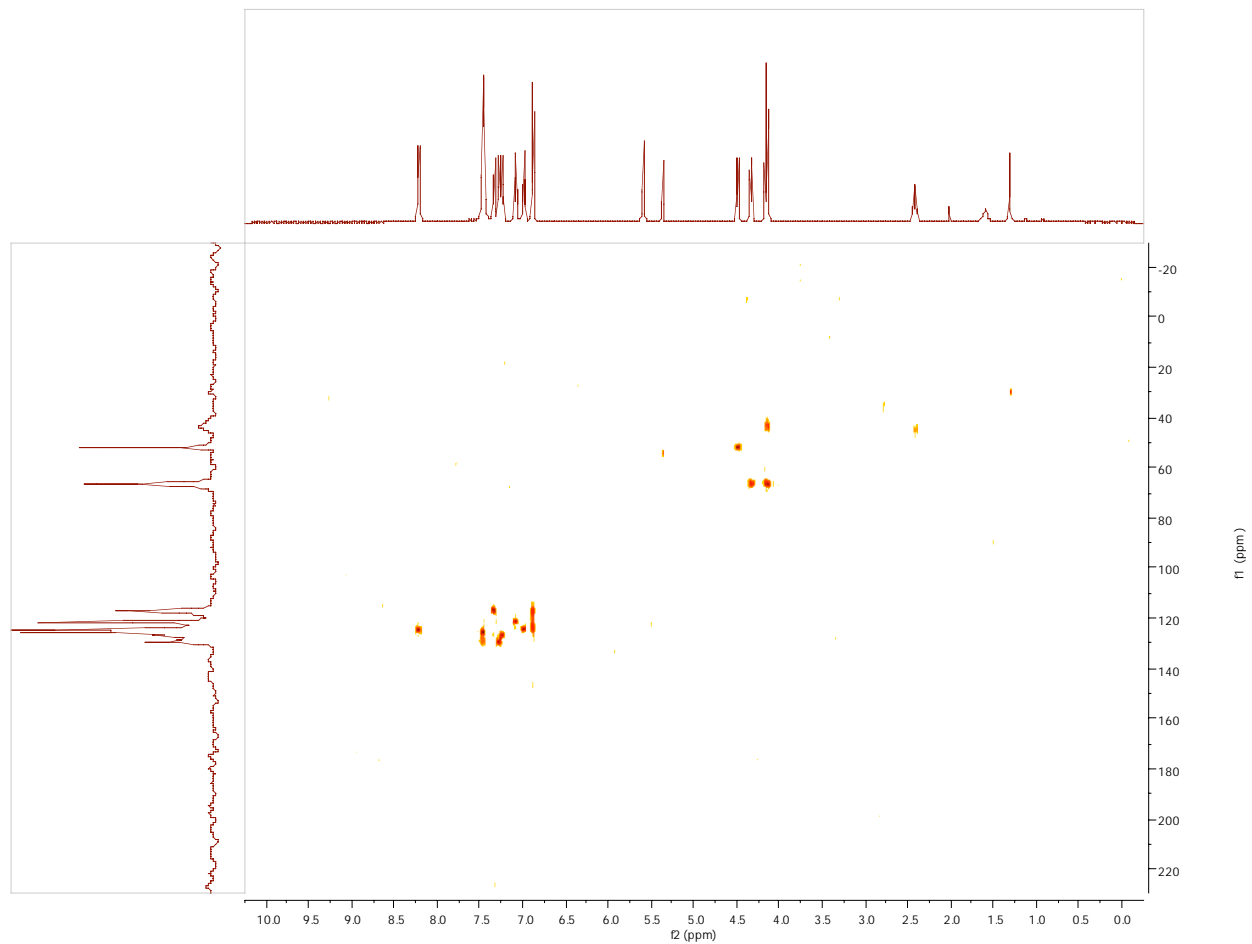

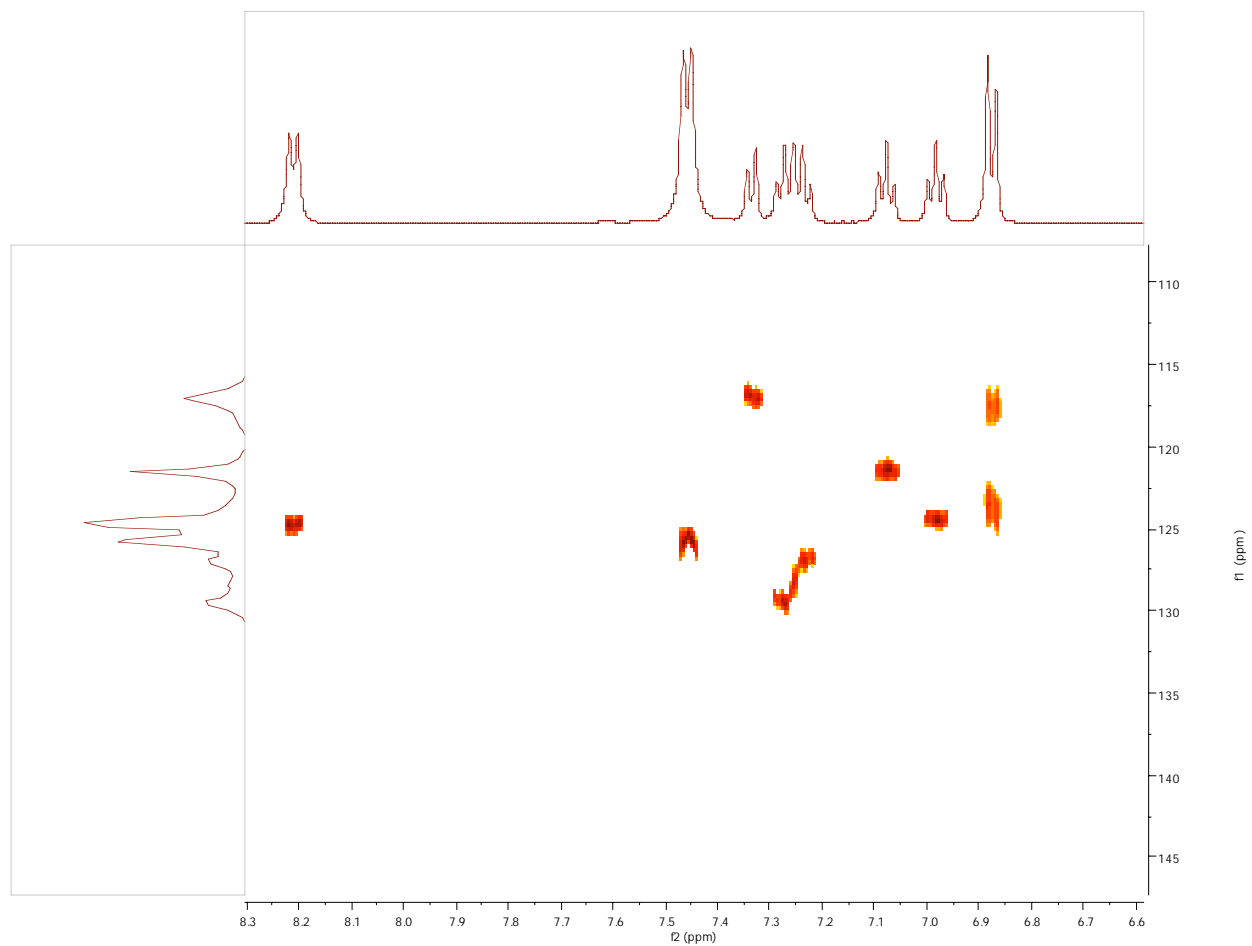

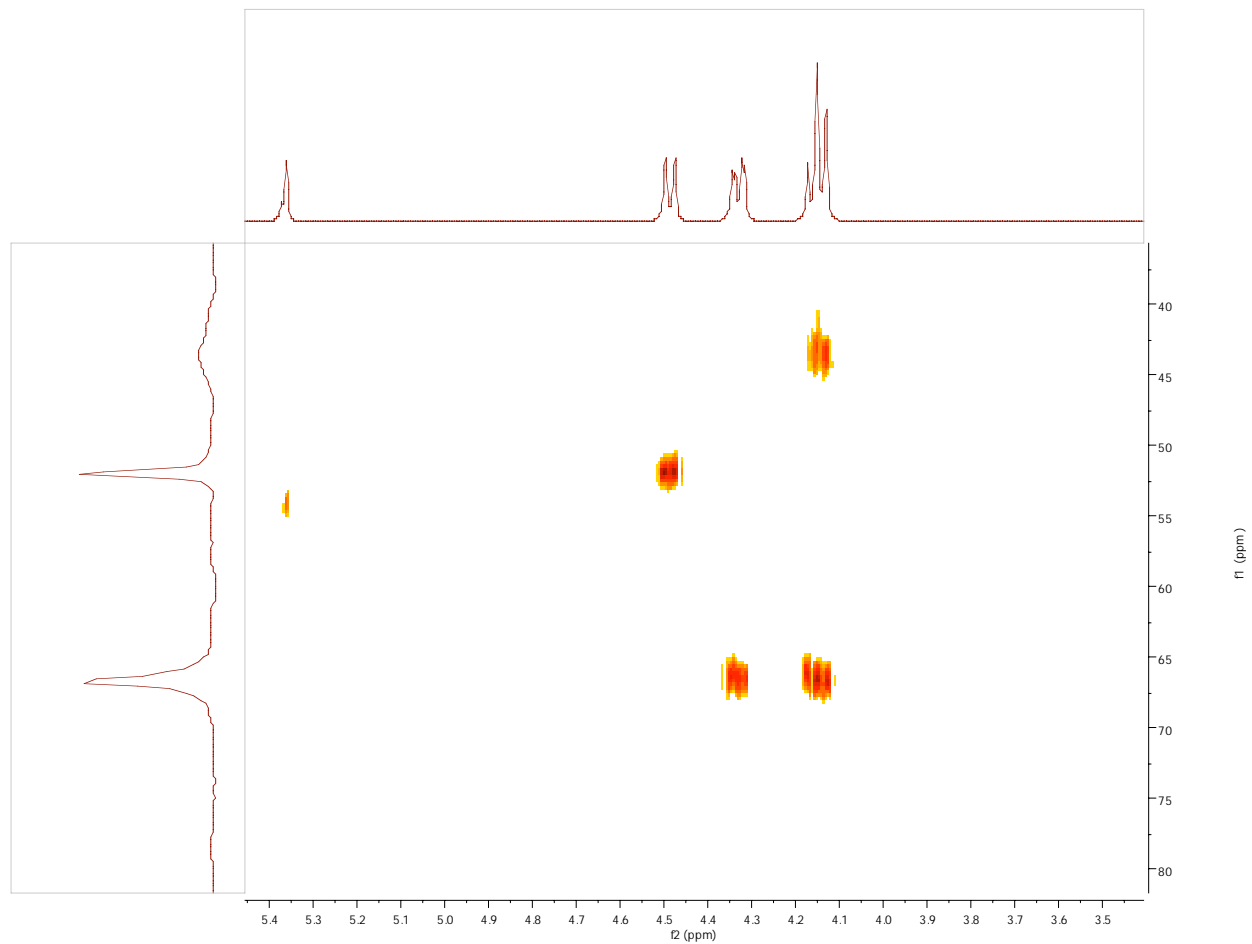

Supplement: c1ob05867c_2.pdf [file c1ob05867c_2.pdf]
